# Supplementary material for: Portrayal of Arabs in Post 9/11 American Films: A Study of the Kingdom and the Traitor
Source: Royal Society of Chemistry journal article supplement (doi:10.1039/c2an35409h), 2011-01-01
Supplement: c2an35409h.pdf [file c2an35409h.pdf]

## Electronic Supplementary Information For

### Gas dispersion concentration of trace inorganic contaminants from fuel gas and analysis using head-column field-amplified sample stacking capillary electrophoresis

Jianmin Yang,<sup>a,b</sup> Hai-Fang Li,<sup>a,\*</sup> Meilan Li,<sup>a,b</sup> and Jin-Ming Lin<sup>a,\*</sup>

<sup>a</sup> Beijing Key Laboratory of Microanalytical Methods and Instrumentation, Department of Chemistry, Tsinghua University, Beijing 100084, China;

<sup>b</sup> Department of Chemistry, Fuzhou University, Fuzhou 350002, China.

\* **Corresponding author.** E-mail: lihaifang@mail.tsinghua.edu.cn; Tel/Fax: +86-10-62797463;

jmlin@mail.tsinghua.edu.cn; Tel/Fax: +86-10-62792343

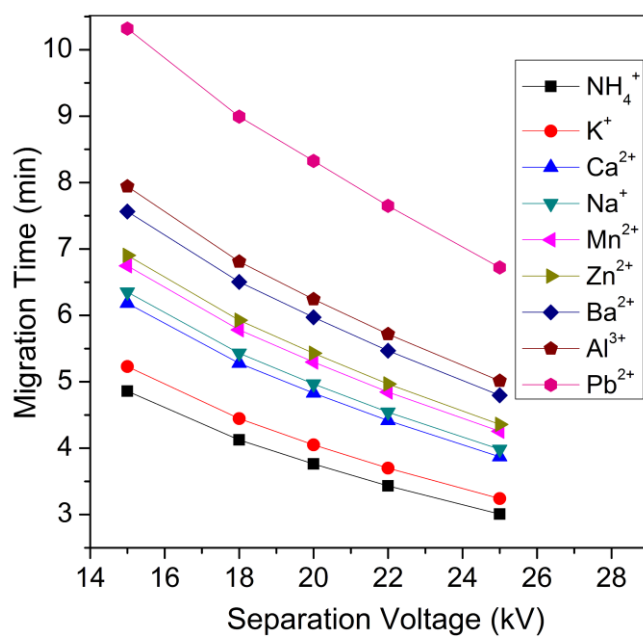

**Fig. S1** Effect of the separation voltage on the separation of inorganic cations. Separation voltage selected at 15, 18, 20, 22, and 25 kV; Other conditions as in Fig. 2a.

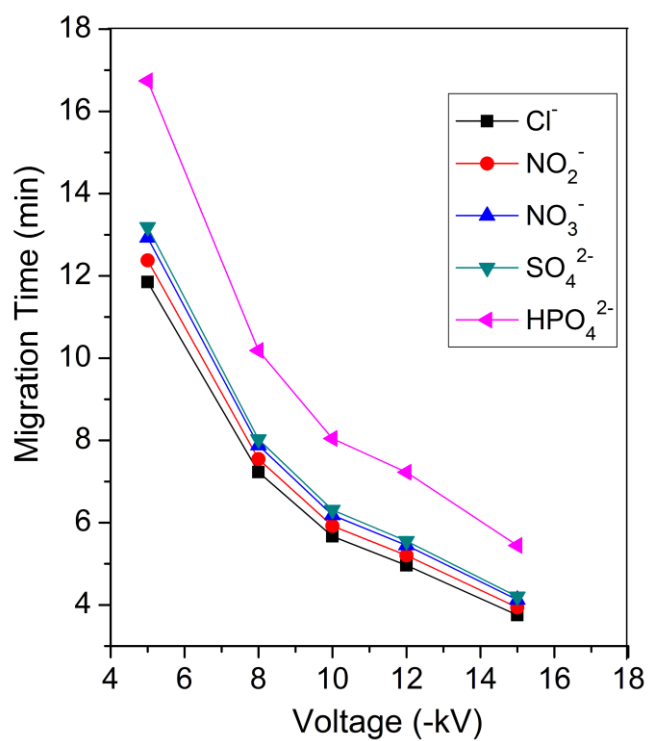

**Fig. S2** Effect of the separation voltage on the separation of inorganic anions. Separation voltage selected -5, -8, -10, -12, and -15 kV; Other conditions as in Fig. 2b.

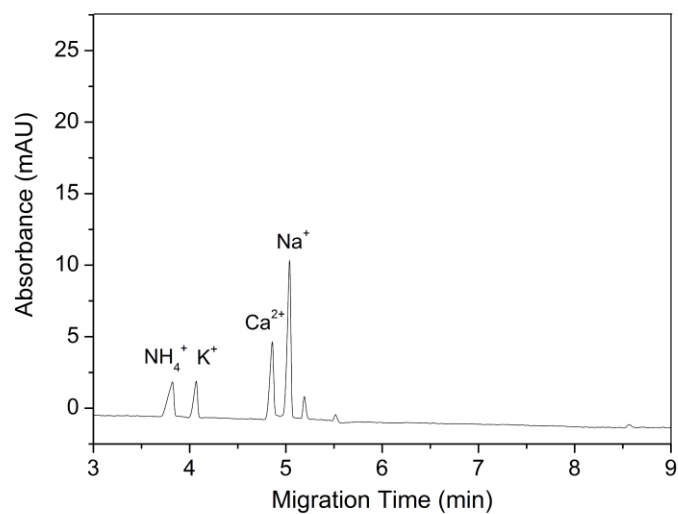

**Fig. S3** Electropherogram of inorganic cations in blank sample. Sampling parameters: 200 mL min<sup>-1</sup> × 90 min; CE conditions as in Fig. 2a.

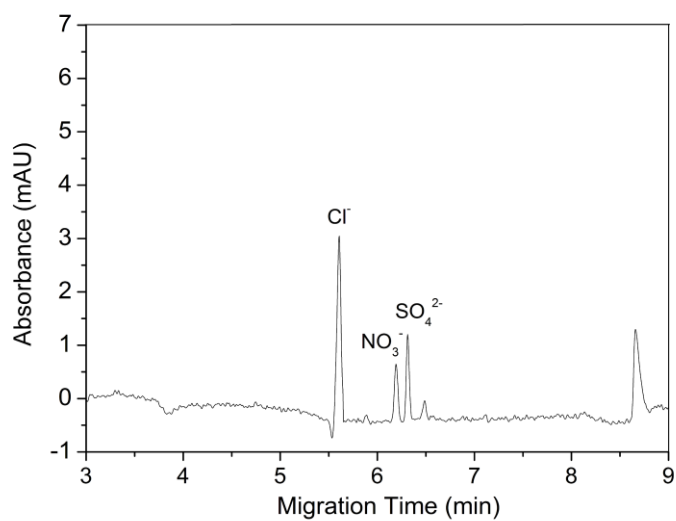

**Fig. S4** Electropherogram of inorganic anions in blank sample. Sampling parameters:  $300 \text{ mL min}^{-1} \times 100 \text{ min}$ ; CE conditions as in Fig. 2b.
